# Supplementary material
Source: publisher figshare collection journal article supplement (https://tandf.figshare.com/ndownloader/files/31581157)
Supplement: Supplementary file 1 [file 31581157]

**Appendix 1. Search Terms**

**Articles were identified using a combination of the following Medical Subject Headings: “premature rupture of membranes” and “digital examination.”**

**MEDLINE – 45 articles**

**Scopus – 47 articles**

**Embase – 31 articles**

**CINAHL – 5 articles**

**ClinicalTrials.gov – 0 trials**

**Cochrane Central Register of Controlled Trials – 3 articles**
